# Supplementary material for: Galvanic current activates the NLRP3 inflammasome to promote Type I collagen production in tendon
Source: eLife journal article supplement (doi:10.7554/elife.73675), 2022-02-24

Figure 2-source data 1

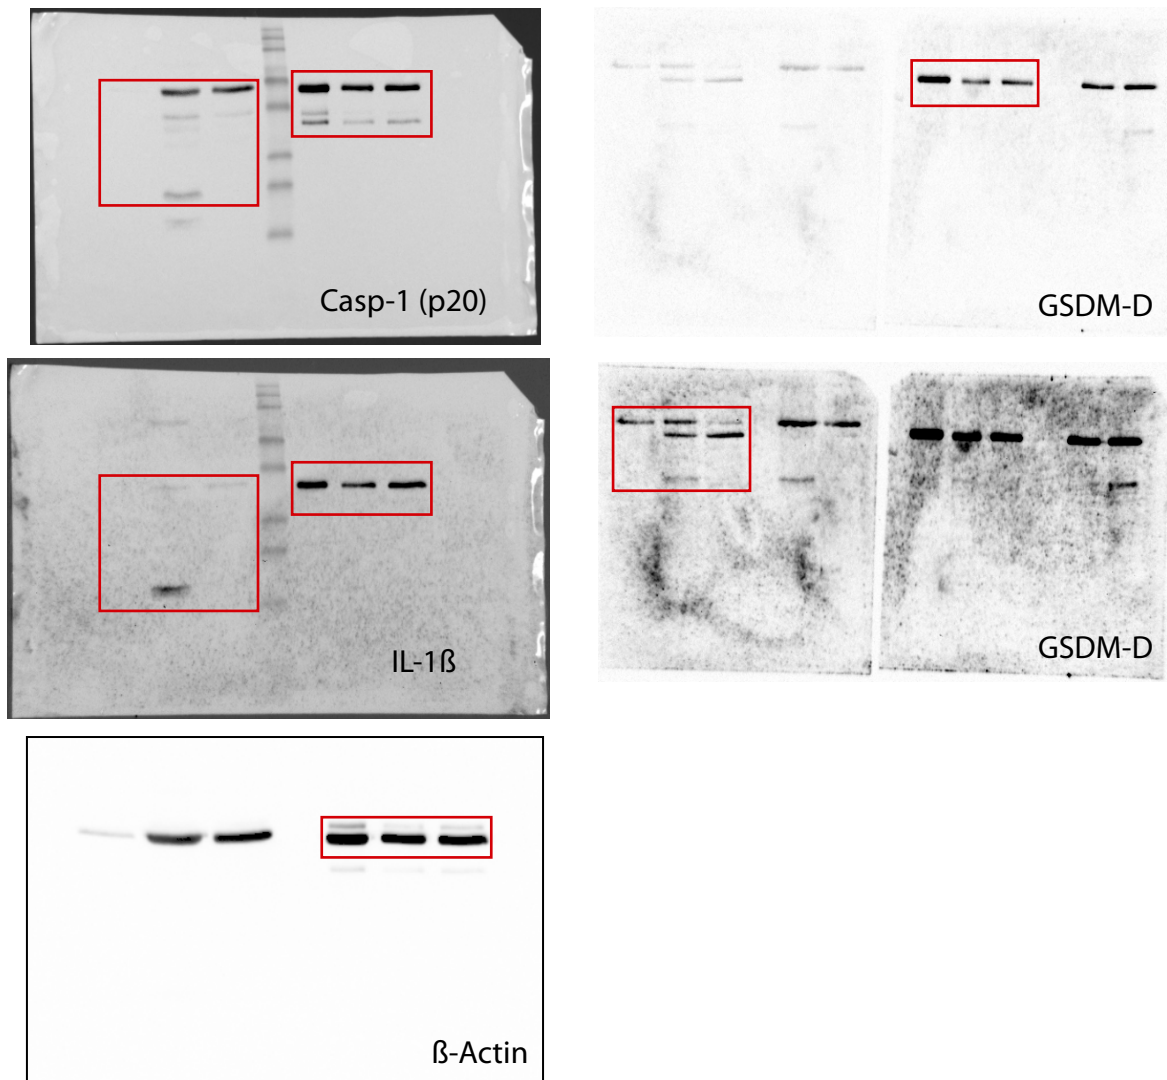

Supplement: supp [file elife-73675-supp-v1.zip]
