# Supplementary material for: Galvanic current activates the NLRP3 inflammasome to promote Type I collagen production in tendon
Source: eLife journal article supplement (doi:10.7554/elife.73675), 2022-02-24
Supplement: supp [file elife-73675-supp-v1.zip]

Archive with 19 entries (19 files):
- elife_poa_e73675_Figure_1_figure_supplement_1.pdf
- elife_poa_e73675_Figure_2_figure_supplement_1.pdf
- elife_poa_e73675_Figure_4_figure_supplement_1.pdf
- elife_poa_e73675_Figure_6_figure_supplement_1.pdf
- elife_poa_e73675_Figure_7_figure_supplement_1.pdf
- elife_poa_e73675_Figure_7_figure_supplement2.pdf
- elife_poa_e73675_Figure_7_figure_supplement3.pdf
- elife_poa_e73675_Figure_7_figure_supplement4.pdf
- elife_poa_e73675_Transparent_Reporting_File.pdf
- elife_poa_e73675_Figure_1_source_data_1.xlsx
- elife_poa_e73675_Figure_2_source_data_1.pdf
- elife_poa_e73675_Figure_2_source_data_2.zip
- elife_poa_e73675_Figure_2_source_data_3.xlsx
- elife_poa_e73675_Figure_3_source_data_1.xlsx
- elife_poa_e73675_Figure_4_source_data_1.xlsx
- elife_poa_e73675_Figure_4_source_data_2.pdf
- elife_poa_e73675_Figure_5_source_data_1.xlsx
- elife_poa_e73675_Figure_6_source_data_1.xlsx
- elife_poa_e73675_Figure_7_source_data_1.xlsx
