# Supplementary material for: Galvanic current activates the NLRP3 inflammasome to promote Type I collagen production in tendon
Source: eLife journal article supplement (doi:10.7554/elife.73675), 2022-02-24
Supplement: supp [file elife-73675-supp-v1.zip › elife_poa_e73675_Figure_1_source_data_1.xlsx]

## Sheet: Fig 1A
Cox2							Il6
Untreated	Galvanic current	LPS	LPS+Galvanic current	IL-4	IL-4+Galvanic current		Untreated	Galvanic current	LPS	LPS+Galvanic current	IL-4	IL-4+Galvanic current
7.23323e-05	0.00216713	0.00361948	0.0110869	3.18135e-05	0.00020177		1.49448e-05	3.88965e-05	0.0042598	0.0220206	3.67201e-06	9.06081e-05
0.000111939	0.000895512	0.0017481	0.00581905	4.59365e-05	6.3848e-05		2.81794e-05	4.87243e-05	0.00472654	0.0280666	3.59163e-05	5.15024e-05
2.2652e-05	8.36659e-05	0.00447158	0.00699238	6.27511e-05	0.000339336		3.32797e-05	6.10352e-05	0.0061722	0.0187106	1.37997e-05	0.000124204
5.36895e-05	1.72266e-05	0.00257716	0.00347204	4.25642e-05	0.000233385		5.87521e-05	5.73439e-05	0.00237971	0.0129133	9.16776e-06	9.81263e-05
5.36895e-05	0.000304768	0.000423603	0.0166308	1.42864e-05	1.20134e-05		1.74067e-05	2.67519e-05	0.00162539	0.00792156	1.44357e-05	2.68448e-05
6.77227e-05	1.30553e-05		0.0284584	1.69307e-05	0.00044931		1.73465e-05	1.28756e-05	0.00146488	0.00767829	7.11848e-06
				8.81304e-05	0.000339336		1.1848e-05		0.00752027	0.0168046
				2.70315e-05	0.000431007		4.28603e-05		0.00341239	0.0115978
Il1b							Tnfa
Untreated	Galvanic current	LPS	LPS+Galvanic current	IL-4	IL-4+Galvanic current		Untreated	Galvanic current	LPS	LPS+Galvanic current	IL-4	IL-4+Galvanic current
0.00116941	0.00558201	0.0128241	0.0277763	0.000280444	0.000211069		7.23323e-05	0.00955188	0.000605326	0.0128686	0.00300171	9.51129e-05
0.00210057	0.00274306	0.0154099	0.0143779	0.00149566	6.51895e-05		0.00282017	0.0101316	0.00654677	0.000417771	0.000564789	0.00119399
0.000387102	0.000187607	0.0370341	0.0358968	0.000662404	0.000244988		0.00020177	0.00718897	0.0130935	0.000771525	0.000250136	0.000798732
0.000821188	3.70543e-05	0.0452794	0.0339605	0.000626673	0.000132199		0.00282996	0.00427459	0.00445611	0.00431926	0.000211801	0.000564789
0.000371333	6.29689e-05	0.0152505	0.0502407	0.000186311	3.52993e-05		0.0052082	0.00535462	0.00382586	0.00533609	0.00114535	0.000624505
0.000560888	5.58504e-06			0.000155586	5.69478e-05		0.000611653	0.00610836	0.00389274	0.000904871	0.000709948	0.000809882
				0.000342882	4.40652e-05		0.00390625	0.0017725	0.00929068	0.00149049	0.00287943	0.00190631
				0.000169668			0.00159194	0.00309681	0.00444069	0.00221266	0.00127525	0.000734984
							0.00287943	0.00604518	0.00364466
								0.000486592

## Sheet: Fig 1B
Arg1							Fizz1
Untreated	Galvanic current	LPS	LPS+Galvanic current	IL-4	IL-4+Galvanic current		Untreated	Galvanic current	LPS	LPS+Galvanic current	IL-4	IL-4+Galvanic current
8.07519e-07	8.13136e-07	3.04934e-07	1.7858e-06	0.000590817	0.000311172		8.13136e-07	1.73696e-06	1.41575e-06	3.23872e-08	0.181118	0.0349152
1.166e-06	1.21974e-06	8.44734e-07	1.03639e-06	0.000483231	0.000163888		1.63192e-06	4.98812e-07	3.04285e-08	1.29549e-07	0.108067	0.0251203
2.79252e-06	6.24844e-07	1.33475e-06	5.12836e-07	0.000288328	7.94276e-05		4.22367e-07	1.86163e-06	3.22752e-08	1.6341e-07	0.0874741	0.0549781
8.50609e-07	8.33104e-07	2.5965e-06	8.09241e-06	0.000286337	7.8879e-05		1.62065e-06	4.63798e-07		1.78438e-08	0.0717936	0.0601622
3.58399e-06	6.2919e-07	1.1564e-05	6.8285e-06	0.000553166	0.000125502		7.66612e-07	3.49065e-07		8.00236e-08	0.137738	0.0448111
1.49648e-06	8.47666e-07	4.89588e-06	6.21851e-06	0.000484908	0.000181845		1.09548e-06	1.35338e-06			0.127185	0.0166308
2.71616e-06	2.98658e-07	1.89821e-05	7.87112e-06	0.000502009	0.000339336		6.01472e-07				0.00666121	0.00220501
	8.8981e-07	5.00544e-07	1.86488e-05	0.00031992	0.000190886						0.00524442	0.00160301
		1.142e-06	1.11463e-06
Mrc1							Ym1
Untreated	Galvanic current	LPS	LPS+Galvanic current	IL-4	IL-4+Galvanic current		Untreated	Galvanic current	LPS	LPS+Galvanic current	IL-4	IL-4+Galvanic current
0.00552427	0.0130482	0.00116537	0.00105029	0.062717	0.0177013		7.83341e-05	0.000248408	0.000238289	7.05986e-05	0.000392505	0.000261663
0.0250334	0.0084023	0.000607428	0.00237147	0.0260062	0.0168629		0.000205297	0.000121648	9.88089e-05	6.89065e-05	0.000303714	0.000376516
0.0055627	0.0043644	0.000755647	0.000880127	0.0216423	0.0154634		5.0268e-05	0.000128139	0.000137336	7.61921e-05	0.000379135	0.000288328
0.00752027	0.00299132	0.000847206	0.00137629	0.0161201	0.0183255			1.92471e-05	0.000121227	4.94044e-05	0.000326642	0.000210338
0.0123017	0.00450268	0.000525144	0.00118985	0.0607909	0.0251203			2.0772e-05	9.92845e-06	8.43606e-06		0.000301616
0.0222508	0.00462927	0.000707491	0.00116134	0.049549	0.0130935				1.77109e-05	1.45361e-05		0.000115886
0.00909948	0.00699238	0.00112958	0.000644291	0.0168629	0.0191038
0.0191038	0.00441002	0.000330056	0.00106865	0.0128686	0.018136
0.0014199	0.00161416	0.000392505	0.000664704
0.00310756	0.00146997		0.000624505

## Sheet: Fig 1C
IL-6						TNFa						IL-1b
Untreated	LPS					Untreated	LPS					Untreated	LPS
		Galvanic current						Galvanic current						Galvanic current
		3 mA	6 mA	12 mA				3 mA	6 mA	12 mA				3 mA	6 mA	12 mA
0	6114.41	3252.85	1680.88	8215.86		0	552.52	75.77	266.55	987.39		0	6.93531	24.7358	67.5127	255.79
0	5370.09	3131.41	2372.57	6672.08		0	767.77	229.79	726.8	1265.76		0	9.24723	12.3298	52.4124	137.01
	2719.62	4899.27	4833.92	2701.42			124.11	297.44	785.3	147.24			8.85665	24.2298	64.2688	149.36
	3637.99	5979.09	4198.23	3001.05			100.63	692.48	284.31	218.94			7.62602	17.0173	73.8473	168.06
	2203.66		5370.09	6408.64			952.98			865.08			6.31949	43.3762	63.7262	100.489
													12.8636	61.447	35.6645	96.435
