# Supplementary material for: Galvanic current activates the NLRP3 inflammasome to promote Type I collagen production in tendon
Source: eLife journal article supplement (doi:10.7554/elife.73675), 2022-02-24
Supplement: supp [file elife-73675-supp-v1.zip › elife_poa_e73675_Figure_2_source_data_3.xlsx]

## Sheet: Fig 2A
		Wild type			Casp1/11 KO					Pycard KO					Nlrp3 KO
		LPS			LPS					LPS					LPS
			Galvanic current			Galvanic current					Galvanic current					Galvanic current
			12 mA			3 mA	6 mA	12 mA			3 mA	6 mA	12 mA			3 mA	6 mA	12 mA
		13.7469	32.092		0	0	5.80463	23.691		0	3.71574	5.42327	9.60306		5.42327	9.25968	23.6644	30.1097
		17.8835	9.96026		0	0	9.84977	42.1187		0	4.23854	3.46445	12.9226		4.61008	10.0432	80.2513	44.9422
		0	108.012		0	0	0	17.1026		0	0	0	0		0	6.77728	10.3178	4.33546
		3.38698	61.0718		0	0	2.45134	6.58705		0	4.04017	0	0		0	3.7872	6.71778	0
		4.91951	105.192		0	6.93852	7.62278	11.0719		0	5.23133	0	8.64257		14.4743	5.17454	6.5074	0
		4.18521	189.157		0	4.4911	9.03957	6.48498		0	0	5.73984	13.9319		0	0	0	6.315
		11.8927	113.873		0	0	0	15.6619					14.4349					13.228
		3.2719	84.1185		0		0	13.0528					3.19253					8.05071
								7.98981
								12.9382
								18.3558
								18.5728
								0
								0
								0
								0

## Sheet: Fig 2B
	LPS	LPS+nigericin	LPS+nigericin	LPS+Galvanic current	LPS+Galvanic current
			+ MCC950		+ MCC950
	39.2246	680.029	16.4885	189.67	22.2919
	31.2166	470.347	10.1041	194.644	25.3155
	0	728.448	14.6892	161.464	29.7931
	2.83452	2527.03	6.81767	137.374	7.39496
	15.4828	1650.28	5.759	113.751	12.4593
	22.9842	1079.44	32.7988
	14.2212	888.565	7.64535
	13.3385	1052.45	9.20744
	3.6954
	5.02837

## Sheet: Fig 2C
		Wild type				Nlrp3 KO					Casp1/11 KO					Pycard KO
		LPS				LPS					LPS					LPS
			Galvanic current				Galvanic current					Galvanic current					Galvanic current
			12 mA	12 mA+MCC950			12 mA					12 mA					12 mA
		68.1458	169.607	55.6749		25.8521	16.557				0	0				12.4249	41.7536
		95.7345	283.716	38.2006		41.7536	14.4919				33.0474	0				36.9828	42.2167
		27.8877	157.589	46.4363			43.7335					34.6144
		40.2729	260.003	0			47.6628					34.6144
		38.2006	265.434	0
		43.3443	228.758
		48.5076

## Sheet: Fig 2D
	LPS		LPS+nigericin		LPS+CdtB		LPS+Galvanic current
		High K+ buffer		High K+ buffer		High K+ buffer		High K+ buffer
	9.29032	11.5377	448.674	31.4705	425.13	385.176	203.614	20.9945
	14.2969	5.37424	310.299	14.8777	683.61	447.844	142.986	28.8088
	9.51923	19.218	529.671	44.7277	2468.71	1575.91	100.035	18.1537
	17.889						87.7668	32.3805
							56.4764	11.2906
							131.442	14.8777
								14.7094
								17.5961
								15.5262
								12.5436
								29.1108
								16.3883

## Sheet: Fig 2E
	LPS
		Nigericin	Galvanic current
			6s 2 impacts	12s 2 impacts	6s 8 impacts
	1.6	0.9	1.4	1.4	1.1
	1.5	0.34	1.5	1.3	1
	1.31	0.35	1.5	1.4	1.1
	1.65		1.3	1.3	1.1
	1.41		1.4	1.3	1
	1.53		1.25
	1.22		1.66
			1.28

## Sheet: Fig 2G
	Untreated	MCC950	Glavanic current	Galvanic current+MCC950
	3.75	0	70.2899	8.54701
	6.81818	3.75	67.4157	8.97436
	2.94118	1.5625	59.4118	10.8108
			65.7895
