# Supplementary material for: Galvanic current activates the NLRP3 inflammasome to promote Type I collagen production in tendon
Source: eLife journal article supplement (doi:10.7554/elife.73675), 2022-02-24
Supplement: supp [file elife-73675-supp-v1.zip › elife_poa_e73675_Figure_3_source_data_1.xlsx]

## Sheet: Fig 3A
	LPS
		Galvanic current
		3 mA	6 mA	12 mA
		6 s	6 s	6 s	12s	6 s
		2 impacts	2 impacts	2 impacts	2 impacts	8 impacts
	3.2	3.86	6.01	11.56	12.87	32.54
	3.16	3.04	2.98	12.68	15.33	31.75
	2.57	2.43	5.97	5.27	27.7	61.11
	3.36	1.95	3.44	4.84	23.51	46.16
	3.88	2.96	2.76	7.28
	2.36	3.39	2.7	5.47

## Sheet: Fig 3B
	Wild type		NLRP3 KO		Pycard KO		Casp1/11 KO
	LPS	LPS+Galvanic current	LPS	LPS+Galvanic current	LPS	LPS+Galvanic current	LPS	LPS+Galvanic current
	2.9	3.17	4.97	12.27	4.3	9.58	2.48	11.5
	2.84	7.63	1.8	5.46	3.83	5.11	2.91	23.26
	3.65	8.69	2.11	3.53	2.6	12.32	2.62	5.78
	2.17	4.91	2.84	7.14	4.36	12.18	3.07	6.43
	1.3	5.64	4.85	5.44	1.57	13.24	1.25	17.39
	1.09	5.8	2.76	7.12	2.27	14.51	2.43	5.7
	2.02	6.78		4.91		6.82	2.41	6.41
	2.52	4.21		6.64		9.34	2.53	8.63
	3.04					9.26		7.38
						6.14		5.18
								9.42
								9.86
								10.45
								3.9
								3.23
								2.8
								3.07

## Sheet: Fig 3C
		IL-1b						IL-18
		LPS						LPS
			Galvanic current						Galvanic current
			2 impacts		8 impacts				2 impacts		8 impacts
			-	MCC950	-	MCC950			-	MCC950	-	MCC950
		39.2246	633.21	37.7425	73.1017	25.9094		68.1458	393.123	71.1855	403.182	98.8629
		31.2166	859.361	48.3467	291.007	42.4824		95.7345	917.496	109.125	806.76	87.5318
		0	236.44	37.5354	2037.78	230.913		27.8877	980.69	100.005	699.681	44.3514
		2.83452	372.281	48.2138	909.891	147.06		40.2729	1648.03	20.689	3557.35	44.3514
		15.4828	164.835	60.8543	1369.89	60.5557		38.2006	1429.29	17.5759	2886.39	14.4919
		22.9842	560.273	69.8224	1043.72	22.4999		43.3443				16.557
		14.2212	703.002	91.1893
		13.3385	594.558	28.1704
		3.6954	562.461	31.4772
		5.02837

## Sheet: Fig 3D
	LPS
		Galvanic current
		6s 2 impacts		12s 2 impacts		6s 8 impacts
		-	MCC950	-	MCC950	-	MCC950
	2.54	10.71	14.96	26.48	20.81	66.73	64.37
	3.27	16.23	22.76	27.68	38.62	61.18	63.33
	3.62	9.23	9.86	25.69	24.06	70.94	57.55
	3.58	13.2	11.19	35.68	33.39	58.62	81.55
	2.75	5.28	9.25	19.29	36.51	49.05	32.19
	2.65	6.06	5.29		11.79	50.95	40.04
	3.21	3.73	5.18		11.71		32.18
	2.81	4.22	7.39		27.57		29.98
	2.54	5.01	9.54		26.71		48.86
	2.25						46.02

## Sheet: Fig 3E
		Slope
		Untreated	Galvanic current
			12 mA	3 mA	6 mA	12 mA
			2 impacts	8 impacts	8 impacts	8 impacts
		29.3924	38.7952	63.5238	158.165	157.557
		14.9629	51.6067	43.6914	99.0752	121.71
		21.9552	16.5238	52.9952	143.58	112.374
		15.0352	39.8632	123.521	172.976	190.015
		14.0962	28.8895	78.5886	68.48	191.858
		14.279	41.5152	43.6448	70.4162
	Kinetic
	Time (min)	Untreated						Galvanic current 12mA 2 impacts						Galvanic current 3mA 8 impacts						Galvanic current 6mA 8 impacts						Galvanic current 12mA 8 impacts					Triton X-100
	60	5834	7763	5745	11635	7562	9399	6150	6568	6643	6832	5533	5343	12220	11298	6945	8094	8927	8925	13165	10043	6606	7339	8382	9213	12810	8983	9182	7213	5795	58224	58226	56233	30947	30947	55175
	90	5466	7998	7207	11710	7773	9394	8585	7998	7872	7262	6466	6825	12670	11411	8043	9626	10119	9452	15939	11698	8494	8969	9325	10186	14493	10780	10171	11014	9172	59996		67312	75713	75713	55682
	120	6840	7780	7178	11764	8790	9154	9443	10124	8085	14890	7370	8009	14210	12634	9220	11529	11558	9912	18557	13549	11462	12370	10496	10647	19481	13601	12432	16160	13445	67566		64029	58836	58836	76322
	150	7523	8367	7949	12370	8417	9404	10774	11843	8238	8772	8334	8834	15907	13357	10816	15397	13717	11055	23873	15971	16029	17577	11835	13128	24264	17466	15511	23535	19334	68438	95060	89441	61260	61260	79777
	180	7939	9146	8511	13267	8971	10380	11503	12889	9056	10413	8916	10307	18256	15237	12931	20824	17532	12490	30393	20697	22363	24520	15445	15948	29572	22097	19509	29261	26016	58284	67883	41743	25327	25327	58909
	210	10386	10099	9419	13737	9878	11756	12280	14127	9372	13277	9937	11807	21869	18033	14822	26541	20551	16039	36644	24965	27523	33292	18823	20047	35893	26979	26562	34693	34801	45286	58338	49685	33683	33683	58416

## Sheet: Fig 3F
		Slope
		Untreated	Galvanic current
			Wild type		Pycard KO
			-	MCC950
		29.3924	227.72	172.703	162.957
		14.9629	156.716	209.869	164.606
		21.9552	180.714	172.703	104.143
			281.188	209.869	102.178
				141.808	154.378
				193.255	146.612
		Kinetic
		Time (min)	Untreated						Galvanic current in wild-type				Galvanic current in wild-type + MCC950						Galvanic current in Pycard KO
		60	6112	7393	5257	7234	7234	9356	6967	5407	6325	6871	9057	9240	9057	9240	7421	6677	5919	7438	7509	7324	5626	5232
		90	6474	7483	5377	9242	9242	10698	13892	7550	11495	15245	15817	17042	15817	17042	12419	12851	8301	15064	9683	8341	7713	7959
		120	7373	8448	5622	10627	10627	11845	19194	11082	17446	24695	21467	24257	21467	24257	16234	18073	12245	15313	12077	10851	10564	12171
		150	8200	8912	5679	11124	11124	13057	27732	15606	23085	33101	26776	29723	26776	29723	20867	23404	17046	16872	15119	13294	32297	16338
		180	8948	9965	6008	12396	12396	15328	33228	21171	28297	41107	31410	35376	31410	35376	24249	29985	23459	30418	18489	17129	16986	21421
		210	10932	11115	6725	13584	13584	18031	41479	29240	33066	48722	34907	41219	34907	41219	29176	35914	30085	32481	23487	23020	28135	27110
