# Supplementary material for: Galvanic current activates the NLRP3 inflammasome to promote Type I collagen production in tendon
Source: eLife journal article supplement (doi:10.7554/elife.73675), 2022-02-24
Supplement: supp [file elife-73675-supp-v1.zip › elife_poa_e73675_Figure_4_source_data_1.xlsx]

## Sheet: Fig 4B
		Time (days)	N= 8 mice per condition and per day
		Control (0 days)	6	1.33333	0	0.666667	0.666667	0	0	2
	Percutaneous electrolysis	3	1.66667	0.666667	23	4.66667	9.66667	3.33333	23.6667	19
		7	1.66667	1.66667	2.66667	4	4.66667	2.66667	4.33333	3
		14	2.66667	3.66667	3.33333	3.33333	4.33333	5.33333	6	7.66667
		21	1.33333	0.666667	2	1	8.33333	1.66667	9.66667	13.6667
	Needling	3	1.33333	2	4	3	2.33333	3.66667	1.33333	2.33333
		7	6	1	4.66667	4	5	4.33333	0.666667	2.33333
		14	1.66667	1	2.33333	3	2	2.66667	4	13
		21	2.33333	1	14	1.33333	3	5	1.66667	2.33333

## Sheet: Fig 4D
		Time (days)	N= 8 mice per condition and per day
		Control (0 days)	7	8	0.666667	1	3.66667	4.33333	5.66667	12
	Percutaneous electrolysis	3	3	2.66667	8.66667	10	9.66667	13.6667	37.3333	19
		7	2.33333	6	5	3	3.33333	0.666667	4.66667	4
		14	2.66667	6	3.66667	4	4.66667	5.66667	2.66667	3.33333
		21	3	1.66667	1.66667	5.33333	8	11	7.66667	8.33333
	Needling	3	2	1.33333	5.66667	8	5.33333	6.66667	7.66667	3
		7	3.66667	3	8	2	3.33333	7.66667	4.33333	2.33333
		14	3.33333	2.33333	2.66667	5.33333	3	2.33333	4.66667	8
		21	1.33333	3.33333	7.66667	5	3.33333	4.33333	11.3333	6.66667
