# Supplementary material for: Galvanic current activates the NLRP3 inflammasome to promote Type I collagen production in tendon
Source: eLife journal article supplement (doi:10.7554/elife.73675), 2022-02-24
Supplement: supp [file elife-73675-supp-v1.zip › elife_poa_e73675_Figure_5_source_data_1.xlsx]

## Sheet: Fig 5A
		Il6				Il1b				Il1a				Il1rn				Cxcl10
		Untreated	Needling	Percutaneous electrolysis		Untreated	Needling	Percutaneous electrolysis		Untreated	Needling	Percutaneous electrolysis		Untreated	Needling	Percutaneous electrolysis		Untreated	Needling	Percutaneous electrolysis
		0.482621	2.55006	5.22536		0.652176	1.34102	47.1221		0	0	3.17035e-05		0.567916	0.596151	6.53755		1.20268	1.84837	8.40501
		1.16032	2.47175	4.215		1.61142	0.511687	28.1163				3.93556e-06		0.869797	0.428911	1.11246		0.745484	2.73445	3.42535
		1.03162	1.06846	6.10729		0.383775	1.10445	14.5539				2.15792e-05		0.510064	0.744194	7.08		1.24941	1.50134	2.94088
		2.02165	2.4632	6.41092		0.857574	0.465978	13.346				4.1833e-05		3.96893	2.1269	1.55159		0.892702	0.990514	4.63076
		1.44948	1.71776	3.68211		3.47818	0.51883	3.03845				1.73465e-05				0.706494			2.06515	5.52606
		0.590714	1.61388	2.34653		0.831238	0.127479	3.02793				9.28332e-05				1.00608			1.82925	2.5425
				4.09974			1.10445	73.9426				6.3848e-05				1.45776			0.702831	1.47044
				3.45942				41.0222				3.88965e-05				16.4356				12.4774
				4.11397				7.02907				8.67323e-06				6.51493				2.48156
				1.39043				0.117305				2.62923e-05				4.2098				3.92108
								25.2521				2.28888e-05				3.2462
								1.77563

## Sheet: Fig 5B
		Nlrp3				Pycard				Casp1				Gsdmd
		Untreated	Needling	Percutaneous electrolysis		Untreated	Needling	Percutaneous electrolysis		Untreated	Needling	Percutaneous electrolysis		Untreated	Needling	Percutaneous electrolysis
		1.17487	0.987943	0.291688		1.32485	0.380464	0.362445		0.908148	0.0255772	0.0203476		2.27837	1.63921	1.78139
		1.43644	0.416821	0.069228		1.03228	0.966494	0.134981		0.901875	0.0214333	0.0048292		2.31017	1.90264	1.78139
		0.981119	0.366656	0.860055		1.2065	0.618066	0.239124		0.997231	0.0756771	0.0599956		1.0629	1.8	0.71847
		0.753929	0.307253	0.120533		0.582703	0.36878	0.242462		1.27544	0.119162	0.00840813		0.346998	2.96493	1.47223
		1.03706	1.08485	0.421177		0.997116	0.79876	0.657851		0.959929	0.0457844	0.0293804		0.515127	4.7338	2.29421
		0.772443	1.70823	2.47512		1.04307	1.56464	2.66814				4.30496			0.97468	0.360482
			0.656333	6.26581			0.829799	4.74311				6.94512				0.686818
				1.92186				2.0503				3.26255				0.0342679
				2.5359				0.615928				0.134065				0.831046
				2.87288				1.49571				2.03637				0.56175
				4.1916				2.66814				3.69609				0.645281
								3.20613				4.42599				0.422786
