# Supplementary material for: Galvanic current activates the NLRP3 inflammasome to promote Type I collagen production in tendon
Source: eLife journal article supplement (doi:10.7554/elife.73675), 2022-02-24
Supplement: supp [file elife-73675-supp-v1.zip › elife_poa_e73675_Figure_6_source_data_1.xlsx]

## Sheet: Fig 6A
	Il1b			Il1rn			Cxcl10
	wild type	NLRP3 KO		wild type	NLRP3 KO		wild type	NLRP3 KO
	0.33	0.23		1.44	0.27		2.62	0.18
	1.17	0.07		0.25	0.29		1.07	0.13
	0.08	0.2		1.56	0.13		0.92	0.19
	0.14	0.43		0.34	0.25		1.44	1.33
	0.14	0.07		0.16	0.04		1.24	0.07
	3.43	0.02		0.22	0.43		0.57	0.68
	1.91			0.32	0.13		0.33	0.06
	2.19			3.63			1.76
	1.31			1.44			0.69
	0.68			0.93			0.14
	0.62			0.72			0.22

## Sheet: Fig 6B
	Nlrp3			Pycard			Casp1			Gsdmd
	wild type	NLRP3 KO		wild type	NLRP3 KO		wild type	NLRP3 KO		wild type	NLRP3 KO
	0.15	0.11		0.23	1.31		0.01	1.61		1.84	0.01
	0.03	0.03		0.08	0.65		0	2.07		0.74	1.1
	0.43	0.03		0.15	1.91		0.03	2.96		1.52	1.8
	0.06	0		0.15	0.95		0	4.16		2.38	0.55
	0.21	0.1		0.41	1.07		0.01	1.77		0.37	0.25
	1.24	0.03		1.68	0.55		2.07	0.8		0.71	0.85
	3.13	0.16		2.98	0.42		3.34	1.04		0.04
	0.96			1.29	0.58		1.57	0.98		0.86
	1.27			0.39			0.06			0.58
	1.43			0.94			0.98			0.67
	2.09			1.68			1.78			0.44
				2.02			2.13

## Sheet: Fig 6C
	Il6
	wild type	NLRP3 KO
	0.84	0.53
	1	0.64
	0.34	1.22
	0.9	6.23
	0.57	0.5
	1	6.58
		0.43
		3.49

## Sheet: Fig 6D
	Polymorphonuclear cells			F4/80+ cells
	wild type	NLRP3 KO		wild type	NLRP3 KO
	1.66667	27		3	12
	0.666667	33		2.66667	9.66667
	23	12.6667		8.66667	31.3333
	4.66667	28.6667		10	23
	9.66667	21.6667		9.66667	8.66667
	3.33333	21.6667		13.6667	18
	23.6667			37.3333
	19			19
