# Supplementary material for: Galvanic current activates the NLRP3 inflammasome to promote Type I collagen production in tendon
Source: eLife journal article supplement (doi:10.7554/elife.73675), 2022-02-24
Supplement: supp [file elife-73675-supp-v1.zip › elife_poa_e73675_Figure_7_source_data_1.xlsx]

## Sheet: Fig 7A
	Tgfb1
	wild type	NLRP3 KO
	1.51	0.03
	1.37	0.05
	0.44	0.02
	0.75	0.06
	1.48	0.36
	0.69	0.43
	0.58
	0.48
	0.98
	1.16
	1.26
	1.3

## Sheet: Fig 7B
	3 days							7 days							14 days
	Type III collagen			Type I collagen				Type III collagen			Type I collagen				Type III collagen			Type I collagen
	Untreated	Needling	Percutaneous electrolysis	Untreated	Needling	Percutaneous electrolysis		Untreated	Needling	Percutaneous electrolysis	Untreated	Needling	Percutaneous electrolysis		Untreated	Needling	Percutaneous electrolysis	Untreated	Needling	Percutaneous electrolysis
	94.671	85.139	90.889	5.32938	14.8606	9.11096		94.671	84.04	86.195	5.32938	15.9596	13.8045		94.671	95.957	72.043	5.32938	4.0427	27.9573
	89.457	86.092	87.889	10.5434	23.6951	12.1106		89.457	62.191	62.228	10.5434	37.8094	37.772		89.457	79.744	86.426	10.5434	20.1264	13.5725
	88.688	45.322	58.816	11.3118	54.6775	41.1845		88.688	93.225	78.551	11.3118	6.77506	21.4489		88.688	90.322	76.05	11.3118	9.67813	23.9504
	94.518	64.054	87.432	5.48167	35.9457	12.568		94.518	84.955	80.888	5.48167	15.0449	19.112		94.518	90.822	70.148	5.48167	9.17794	29.8516
	73.294	68.764	88.385	26.7058	31.2356	11.615		73.294	88.938	83.184	26.7058	11.0623	16.7489		73.294	76.059	84.709	26.7058	23.941	15.2911
	84.004	93.094	57.229	15.996	6.9062	42.771		84.004	95.012	83.117	15.996	4.98143	16.8831		84.004	76.302	85.97	15.996	23.6981	14.03
	93.465	72.063	65.867	6.53512	27.9374	34.1332		93.465	95.509	55.745	6.53512	4.49062	44.2547		93.465	90.791	85.557	6.53512	9.20919	14.4431
	73.597	58.225	68.872	26.4033	41.7751	31.1278		73.597	94.559	61.36	26.4033	5.4412	38.6401		73.597			26.4033
	87.523			12.4772				87.523			12.4772				87.523			12.4772
	81.022			18.9776				81.022			18.9776				81.022			18.9776
	84.887			15.1126				84.887			15.1126				84.887			15.1126
	90.25			9.74948				90.25			9.74948				90.25			9.74948

## Sheet: Fig 7C
	Type III collagen		Type I collagen
	Wild type	NLRP3 KO	Wild type	NLRP3 KO
	86.195	96.5636	13.8045	3.43638
	62.228	98.5297	37.772	1.47037
	78.551	98.592	21.4489	1.40802
	80.888		19.112
	83.184		16.7489
	83.117		16.8831
	55.745		44.2547
	61.36		38.6401

## Sheet: Fig 7D
		Wild type		NLRP3 KO
		untreated	Percutaneous electrolysis	untreated	Percutaneous electrolysis
		30	22	28	44
		35	20	29	60
		31	19	31	59
		27	20	23	45
		27	29	22	45
		34	24	21	43
		27	26	16	47
		33	25	20	48
				17

## Sheet: Fig 7E
	Maximium tension					Maximm force					Stiffness
	Wild type		NLRP3 KO			Wild type		NLRP3 KO			Wild type		NLRP3 KO
	untreated	Percutaneous electrolysis	untreated	Percutaneous electrolysis		untreated	Percutaneous electrolysis	untreated	Percutaneous electrolysis		untreated	Percutaneous electrolysis	untreated	Percutaneous electrolysis
	7.93316	6.88937	1.5631	5.57454		7.13984	8.26724	6.54729	5.57454		2.75563	5.3234	3.15532	3.30255
	7.73345	4.51313	2.72804	3.42237		5.80009	5.41576	8.37231	6.16026		1.48264	7.87232	4.31562	3.87438
	6.7548	5.35107	1.99212	3.94072		5.46932	8.0266	7.95778	4.43331		3.74099	4.88236	3.79484	2.67067
	8.36595	6.49081	11.1631			5.89609	5.84173				6.18687	5.8596
	8.10305		10.6104			8.10576					1.74472
						8.36595					5.93372
						8.10305					3.25523
											4.35414
