# Supplementary figures and images for: Galvanic current activates the NLRP3 inflammasome to promote Type I collagen production in tendon
Source: eLife journal article supplement (doi:10.7554/elife.73675), 2022-02-24

Figure 7—figure supplement 2

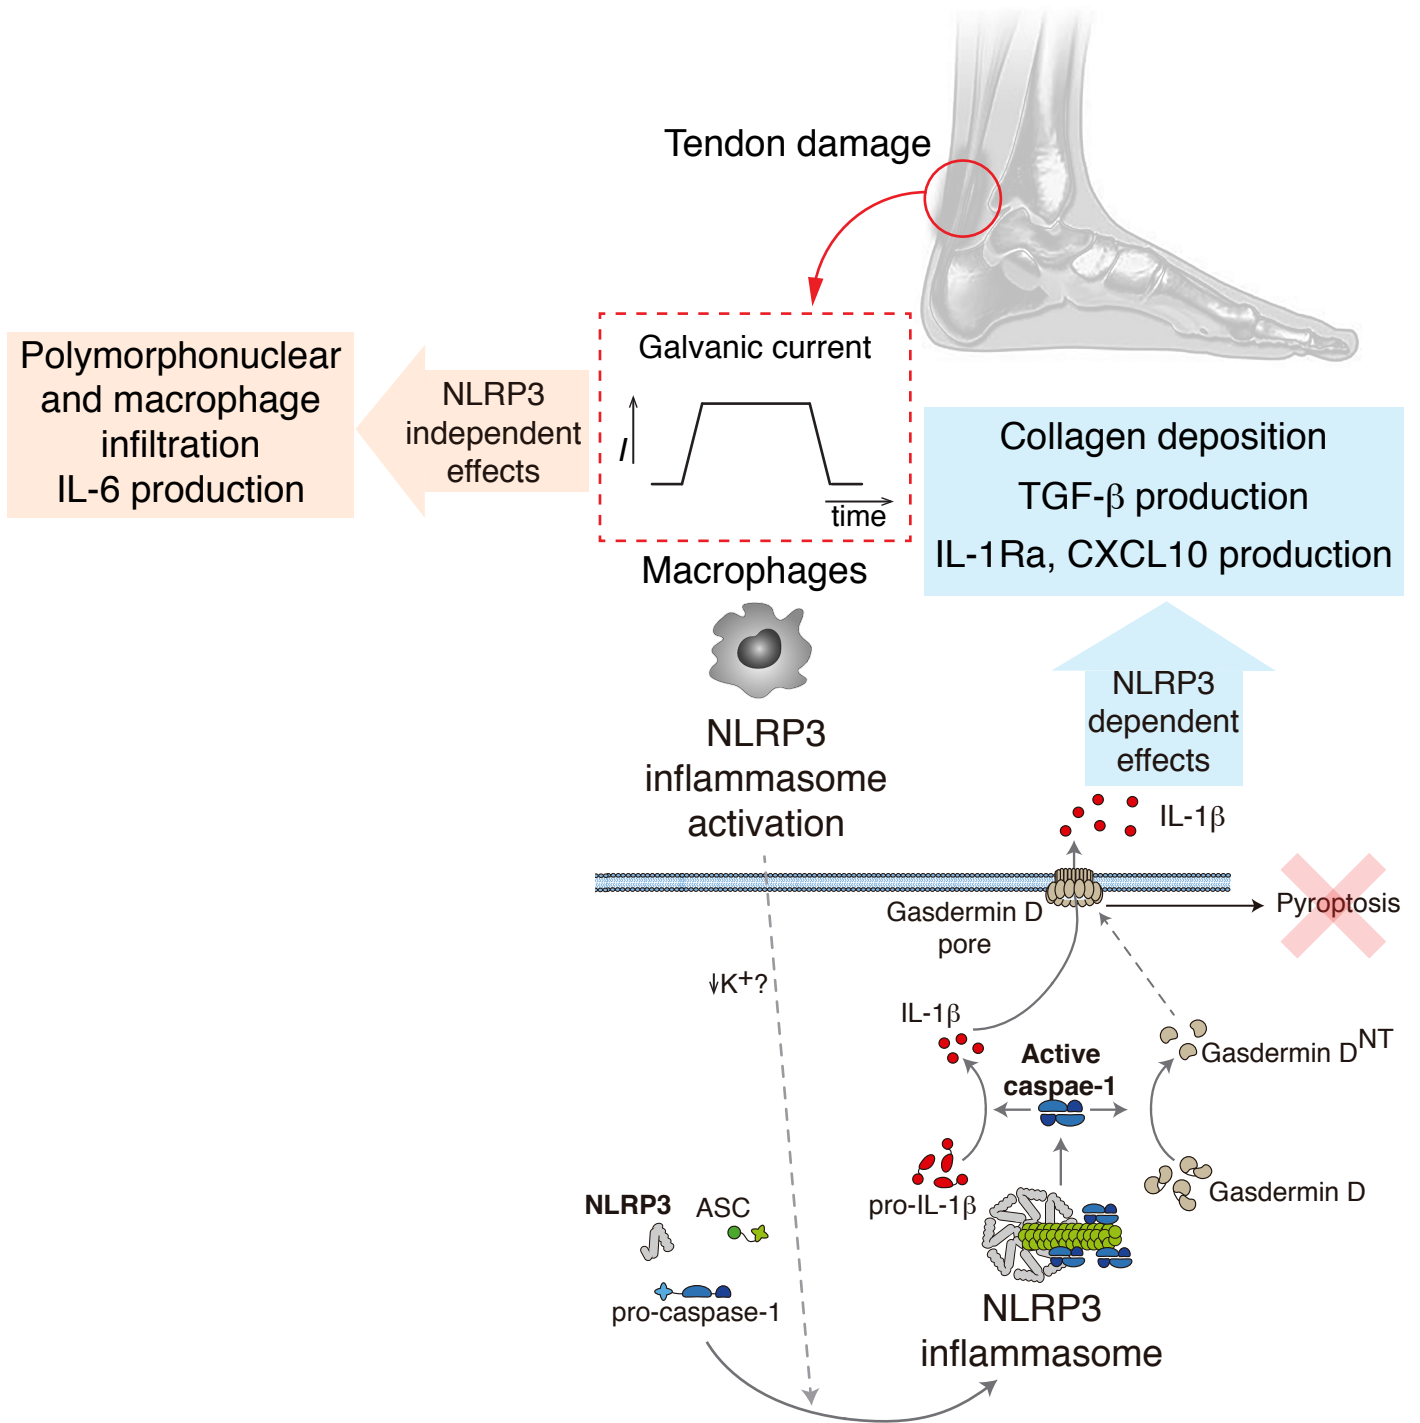

Supplement: supp [file elife-73675-supp-v1.zip]

**Figure 4—figure supplement 1**

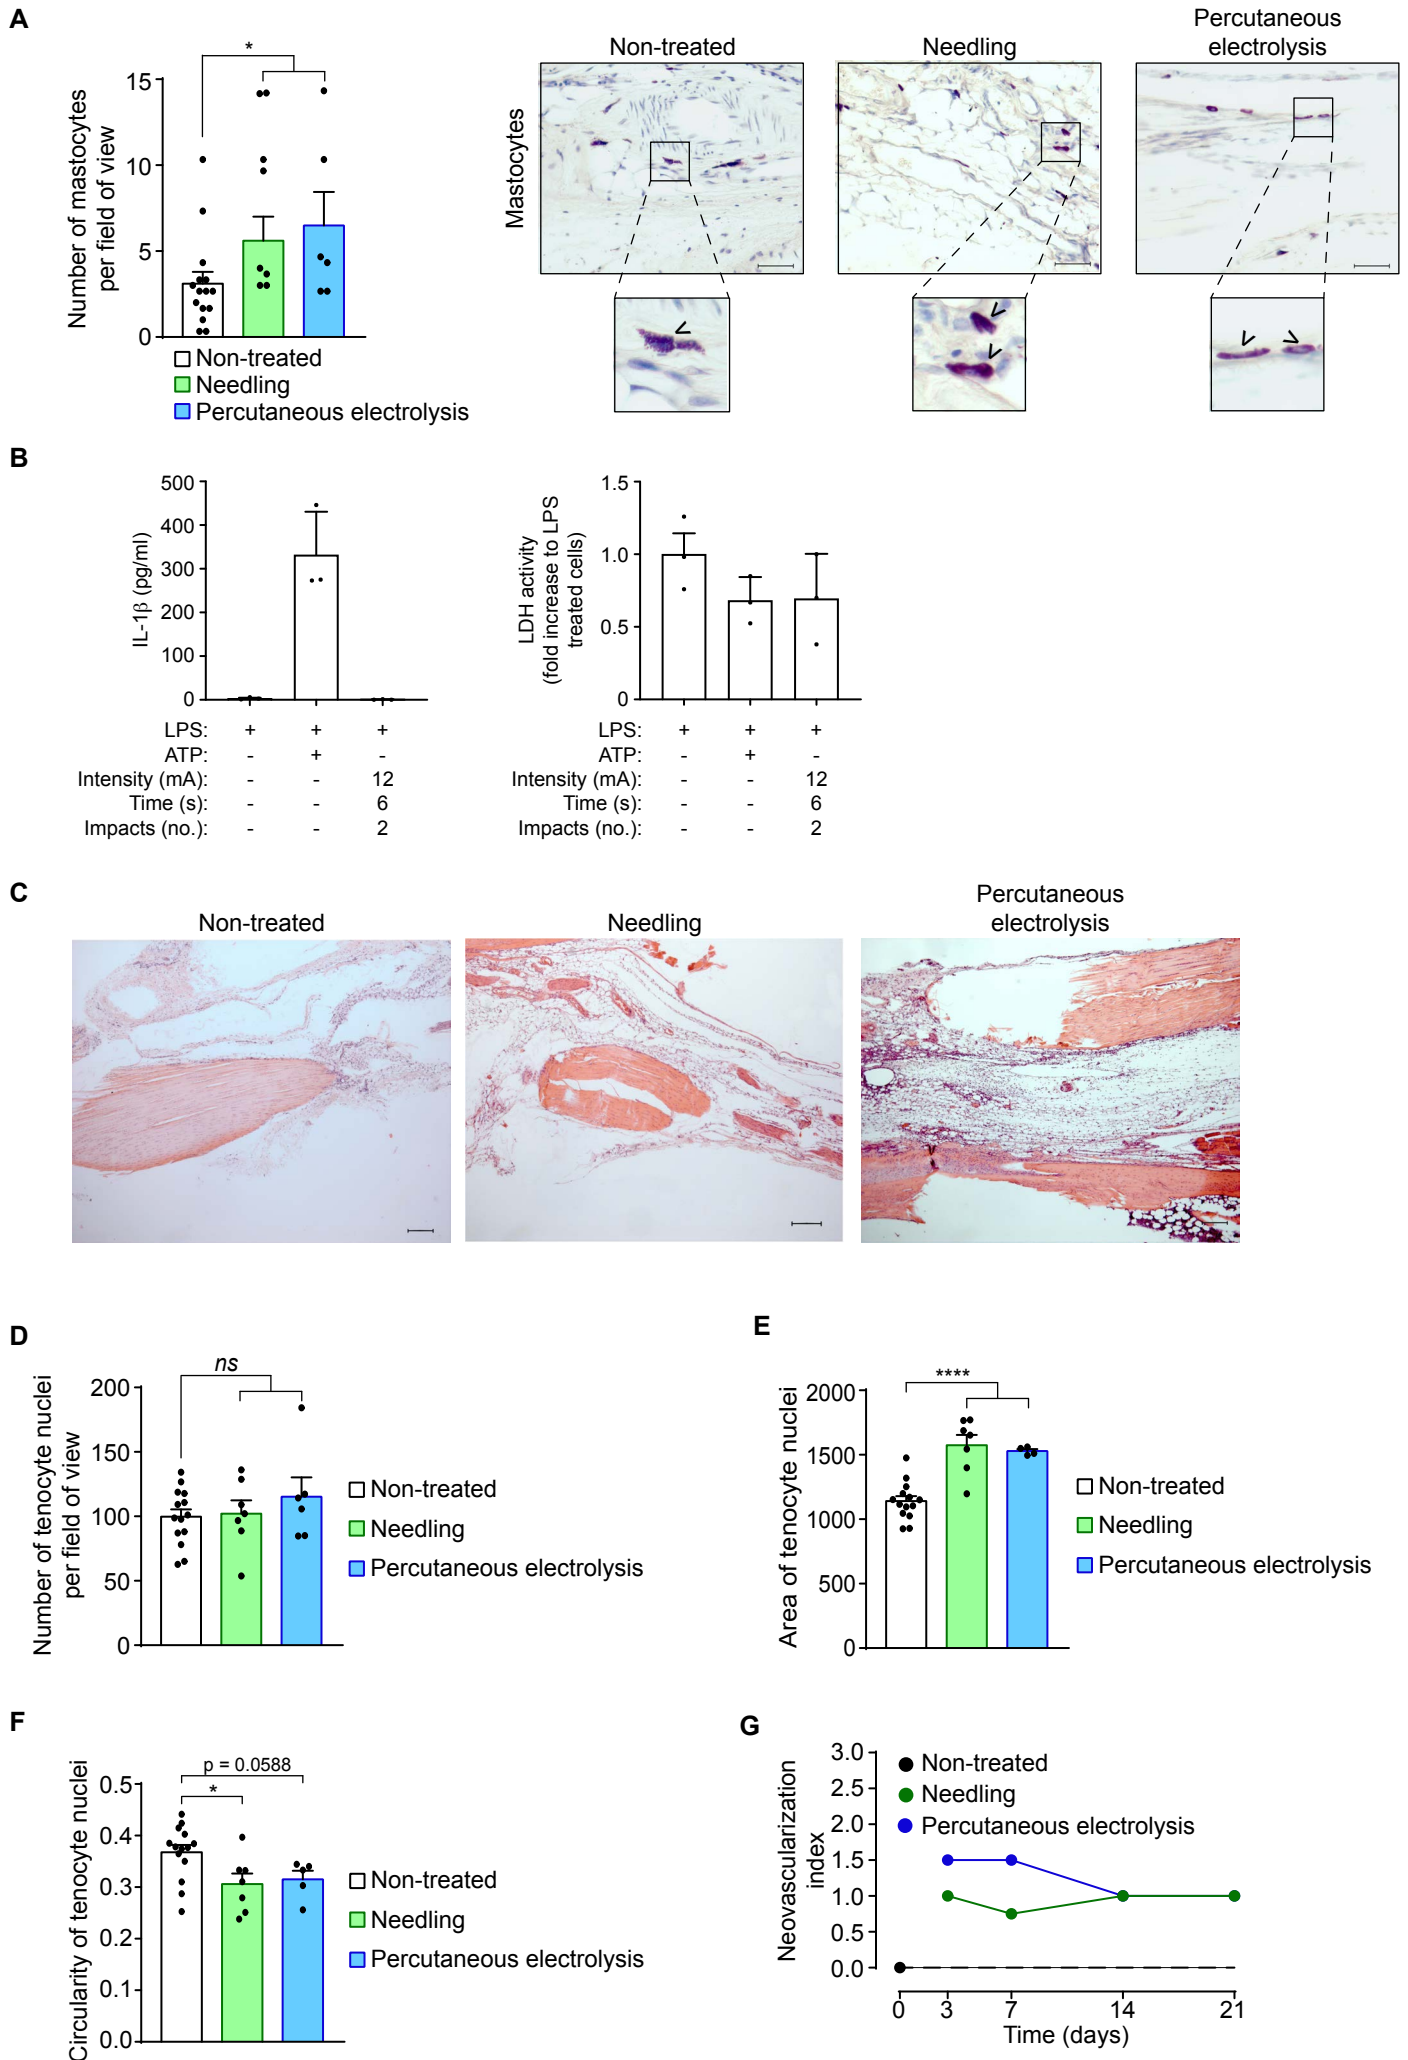

Supplement: supp [file elife-73675-supp-v1.zip]

Figure 7—figure supplement 4

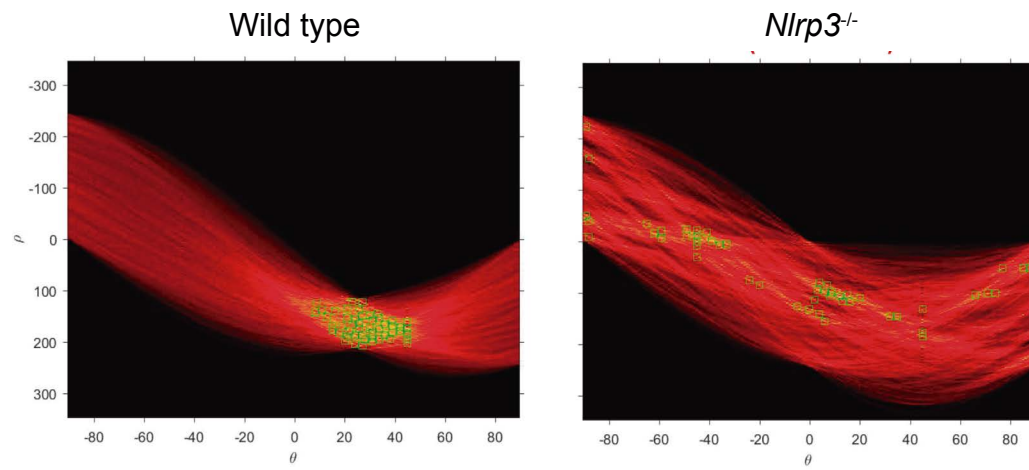

Supplement: supp [file elife-73675-supp-v1.zip]

**Figure 1—figure supplement 1**

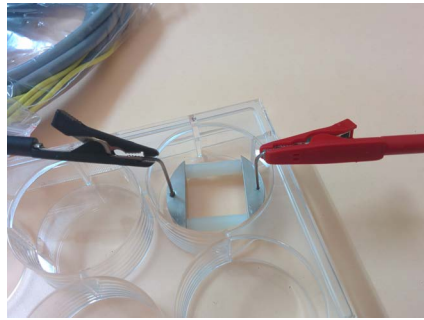

Supplement: supp [file elife-73675-supp-v1.zip]

Figure 2—figure supplement 1

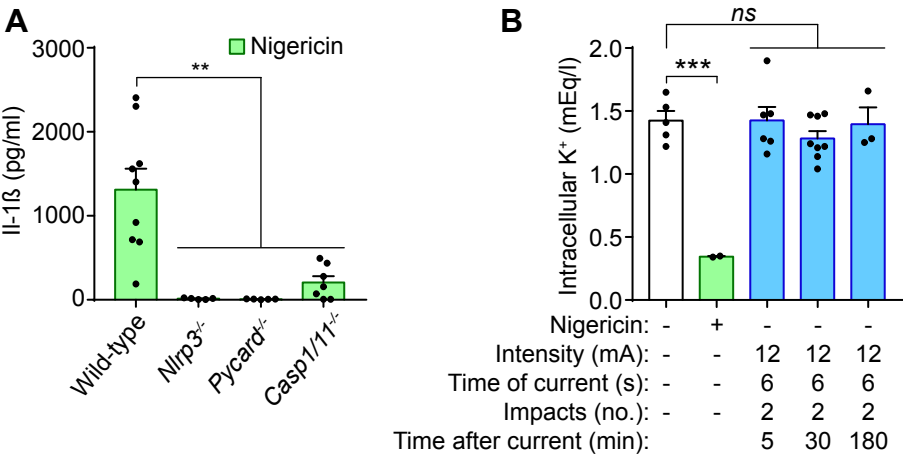

Supplement: supp [file elife-73675-supp-v1.zip]

Figure 7—figure supplement 1

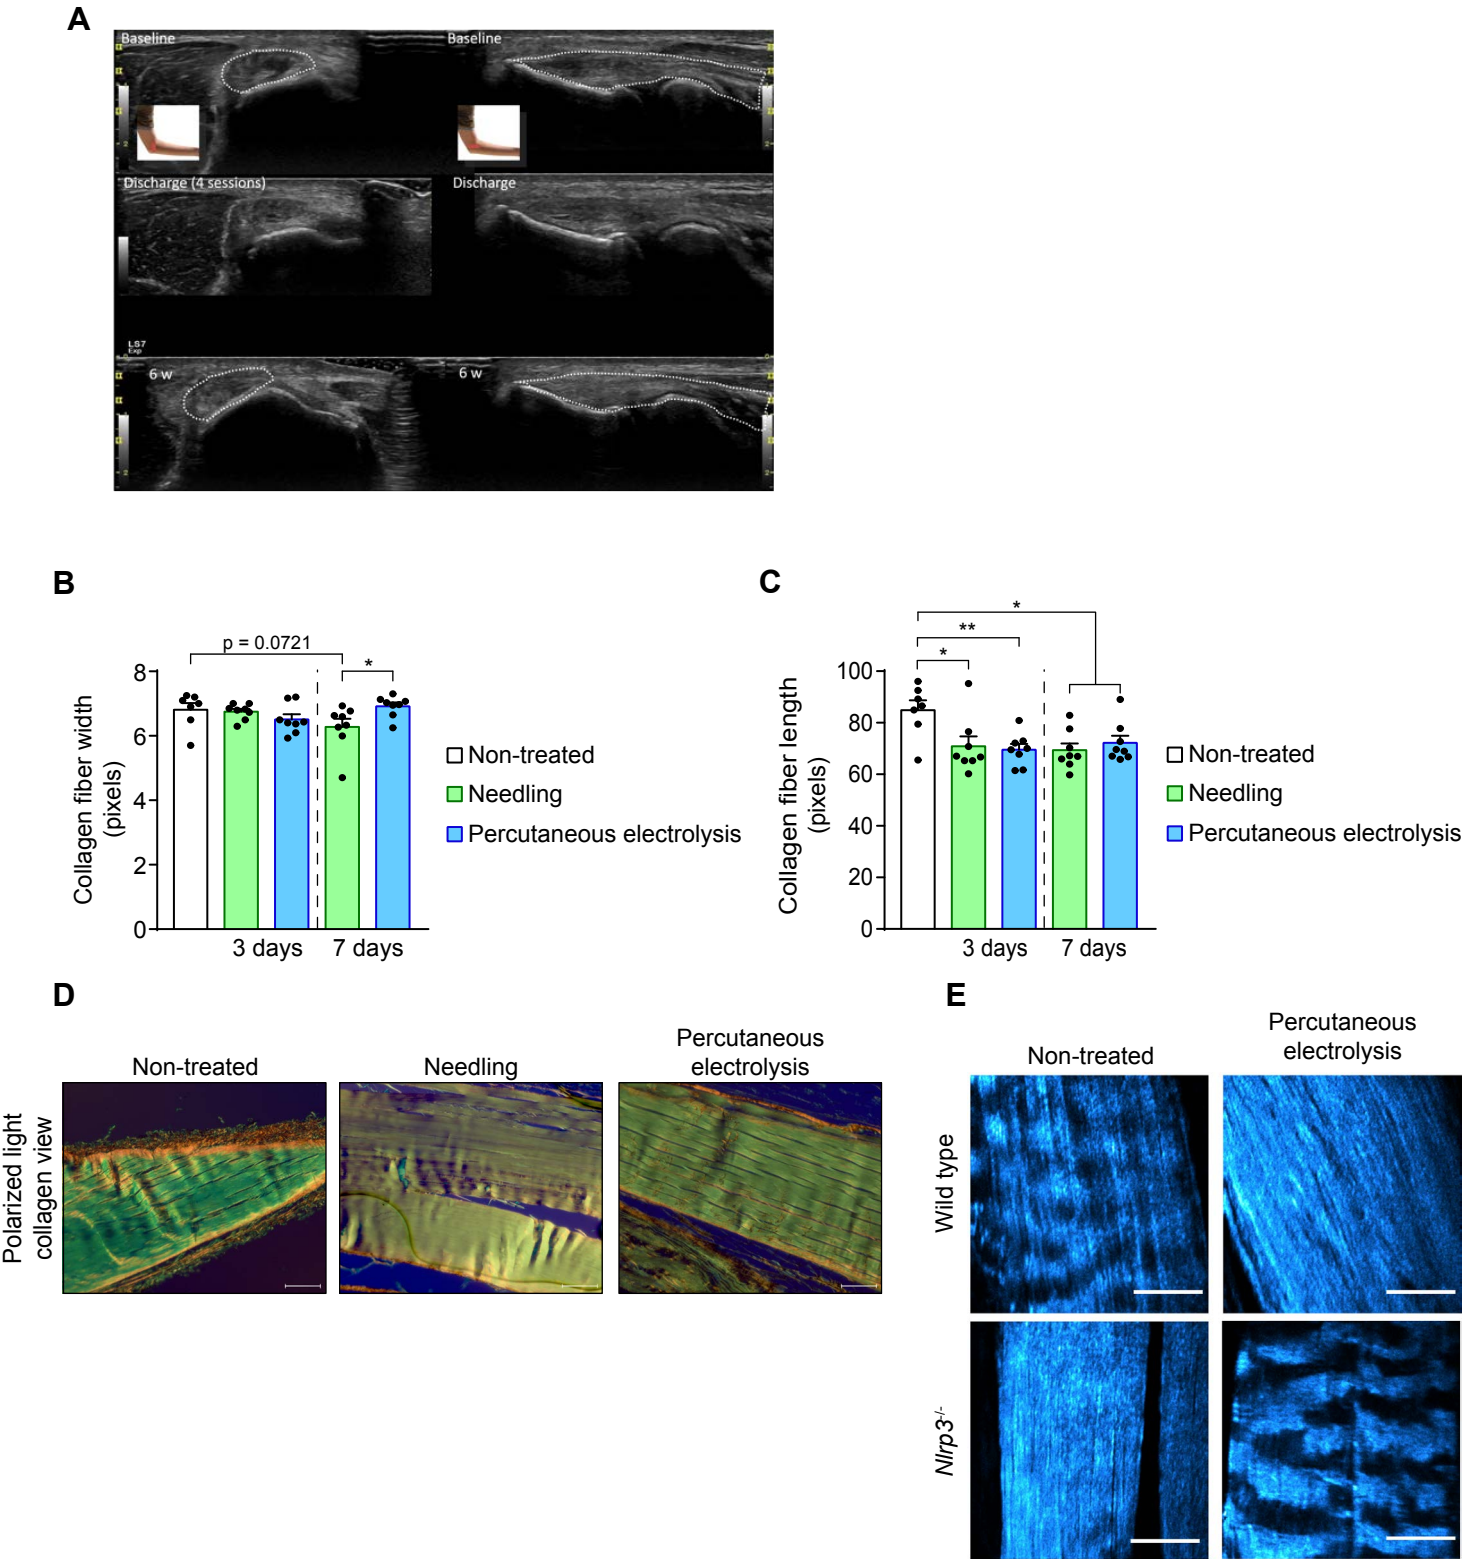

Supplement: supp [file elife-73675-supp-v1.zip]

Figure 6—figure supplement 1

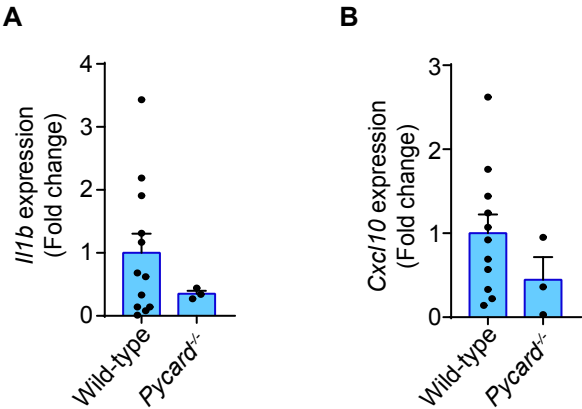

Supplement: supp [file elife-73675-supp-v1.zip]

**Figure 7—figure supplement 3**

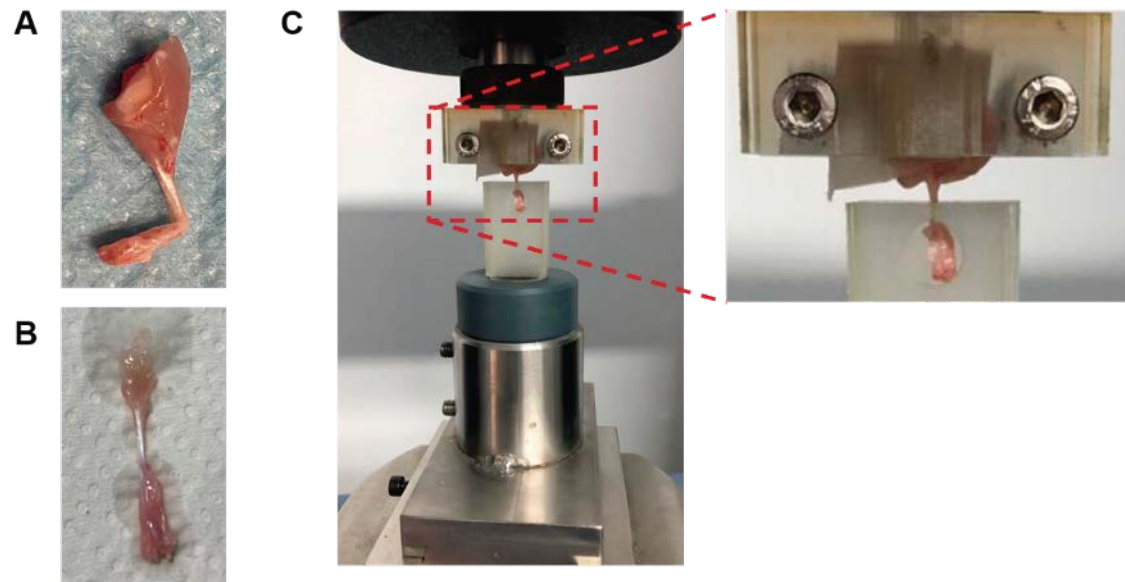

Supplement: supp [file elife-73675-supp-v1.zip › elife_poa_e73675_Figure_7_figure_supplement3.pdf]

Figure 2-source data 1

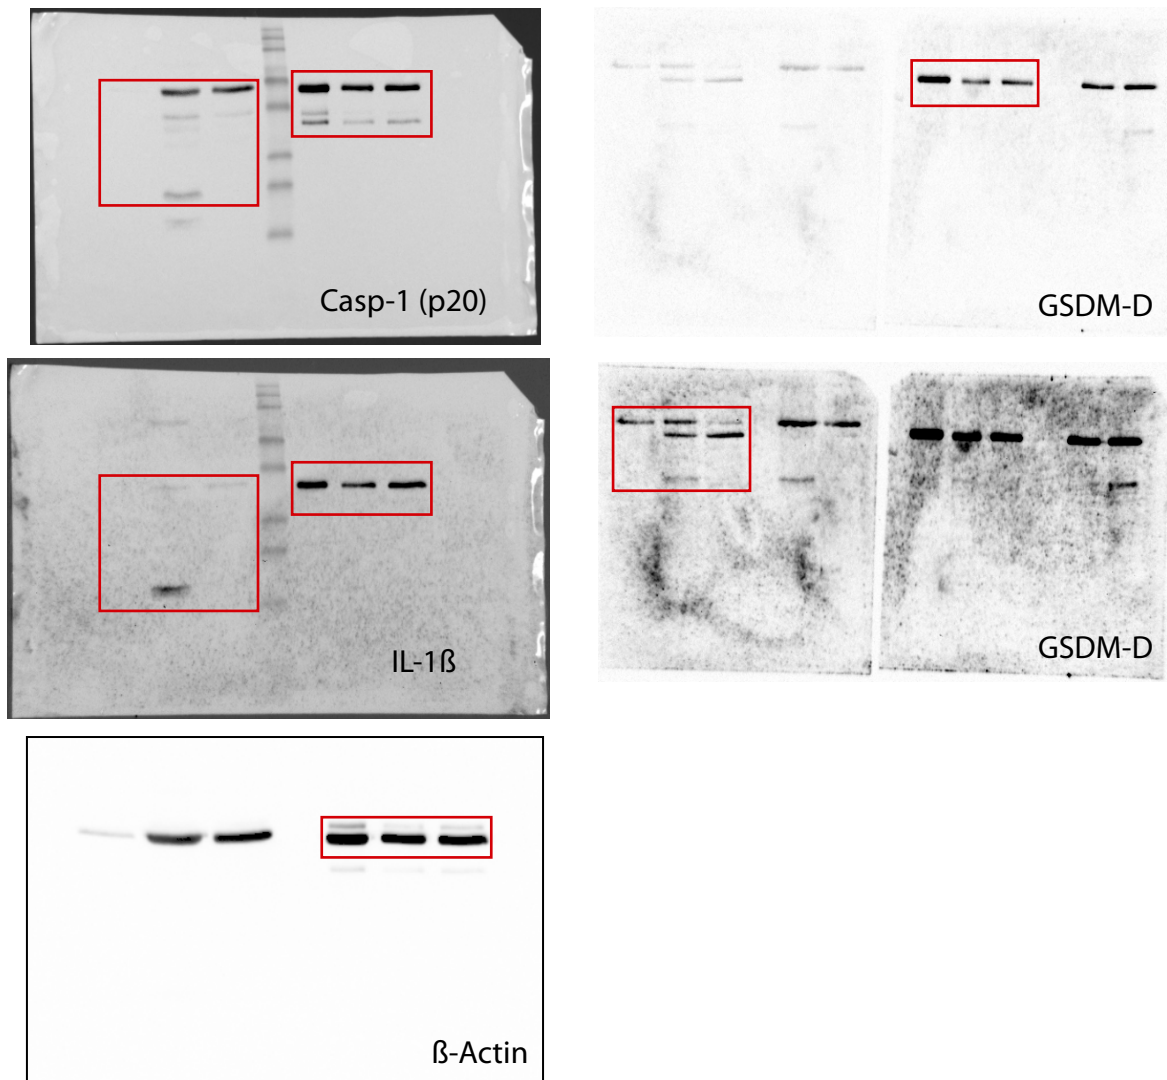

Supplement: supp [file elife-73675-supp-v1.zip › elife_poa_e73675_Figure_2_source_data_1.pdf]

Figure 4 - source data 2

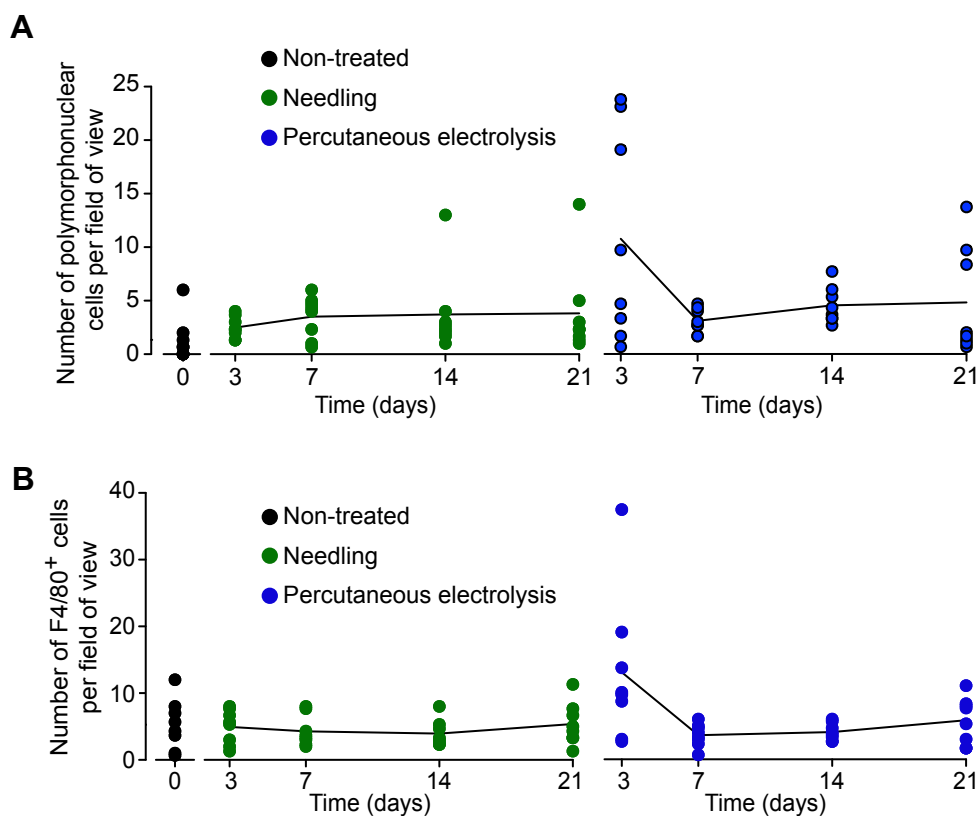

Supplement: supp [file elife-73675-supp-v1.zip › elife_poa_e73675_Figure_4_source_data_2.pdf]
